# Supplementary material for: Novel Graphical Analyses of Runs of Homozygosity among Species and Livestock Breeds
Source: Int J Genomics. 2016 Oct 30;2016:2152847. doi: 10.1155/2016/2152847 (PMC5107238; doi:10.1155/2016/2152847)
Supplement: Supplementary file 2 [file 2152847.f2.xlsx]

## Sheet: Sheet1
Table S1: Genes in the screened regions. Chr - chromosome; Annotation release 104 - position in the genome; Code - pattern in the graphs; Genetic function - broad definition of the gene function; NCBI description - description of the gene in the NCBI database (http://www.ncbi.nlm.nih.gov/projects/mapview/map_search.cgi?taxid=9913).
Codes are: A - concordant increase/decrease of SNPs in a ROH in all the populations; B - few populations showing an opposite pattern compared to the others; C - different patterns between dairy and meat breeds; D - different patterns between bison and domestic cattle breeds; E - a single domestic breed differentiating from the others; F - a long region with an high percentage of ROH; G - a short …
chr	Annotation release 104	Code	Genetic function	Gene/Locus symbol	NCBI description
2	chr2: 41492630-42735547	B	pseudogene	LOC100139196	lysocardiolipin acyltransferase 1 pseudogene, i
2	chr2: 41492630-42735547	B	metabolism-related	GALNT13	polypeptide N-acetylgalactosaminyltransferase 13
2	chr2: 41492630-42735547	B	growth-related	LOC526988	syndecan-3-like pseudogene, in humans the syndecan gene is a key factor in growth-factor-receptor activation.
2	chr2:122093760-123174023	C	growth-related	FABP3	fatty acid binding protein 3, muscle and heart
2	chr2:122093760-123174023	C	disease-related	TINAGL1	tubulointerstitial nephritis antigen-like 1
2	chr2:122093760-123174023	C	disease-related	LOC532108	ornithine decarboxylase-like
2	chr2:122093760-123174023	C	metabolism-related	PUM1	pumilio RNA-binding family member 1
2	chr2:122093760-123174023	C	metabolism-related	PEF1	penta-EF-hand domain containing 1
2	chr2:122093760-123174023	C	metabolism-related	NKAIN1	Na+/K+ transporting ATPase interacting 1
2	chr2:122093760-123174023	C	growth-related	COL16A1	collagen, type XVI, alpha 1
2	Chr2: 6213566-6220196	C	growth-related	MSTN	myostatin
2	chr2:122093760-123174023	C	pseudogene	LOC787484	60S ribosomal protein L10a pseudogene
2	chr2:122093760-123174023	C	pseudogene	LOC787568	tubulin alpha-1C chain-like pseudogene
2	chr2:122093760-123174023	C	metabolism-related	LCK	LCK proto-oncogene, Src family tyrosine kinase
2	chr2:122093760-123174023	C	metabolism-related	TMEM234	transmembrane protein 234
2	chr2:122093760-123174023	C	metabolism-related	TMEM39B	transmembrane protein 39B
2	chr2:122093760-123174023	C	metabolism-related	KHDRBS1	KH domain containing, RNA binding, signal transduction associated 1
2	chr2:122093760-123174023	C	metabolism-related	HCRTR1	hypocretin (orexin) receptor 1
2	chr2:122093760-123174023	C	metabolism-related	SERINC2	serine incorporator 2
2	chr2:122093760-123174023	C	metabolism-related	LOC101902670	serine incorporator 2-like
2	chr2:122093760-123174023	C	metabolism-related	ZCCHC17	zinc finger, CCHC domain containing 17
2	chr2:101510681-102288272	C	reproduction-related	SPAG16	sperm associated antigen 16
2	chr2:122093760-123174023	C	disease-related	SNRNP40	small nuclear ribonucleoprotein 40kDa (U5)
2	chr2:101510681-102288272	C	uncharacherized	LOC104969096	uncharacterized LOC104969096
2	chr2:122093760-123174023	C	uncharacherized	LOC104971334	uncharacterized LOC104971334
2	chr2:122093760-123174023	C	uncharacherized	LOC101902428	uncharacterized LOC101902428
2	chr2:122093760-123174023	C	uncharacherized	LOC100847376	uncharacterized LOC100847376
2	chr2:122093760-123174023	C	uncharacherized	LOC104971335	uncharacterized LOC104971335
2	chr2:122093760-123174023	C	uncharacherized	LOC101902843	uncharacterized LOC101902843
2	chr2:122093760-123174023	C	uncharacherized	LOC101902958	uncharacterized LOC101902958
2	chr2:101510681-102288272	C	disease-related	IKZF2	IKAROS family zinc finger 2 (Helios)
2	chr2:122093760-123174023	C	metabolism-related	FAM167B	family with sequence similarity 167, member B
2	chr2:122093760-123174023	C	metabolism-related	MTMR9	myotubularin related protein 9-like
2	chr2:122093760-123174023	C	metabolism-related	EIF3I	eukaryotic translation initiation factor 3, subunit I
2	chr2:122093760-123174023	C	metabolism-related	DCDC2B	doublecortin domain containing 2B
2	chr2:122093760-123174023	C	uncharacherized	IQCC	IQ motif containing C
2	chr2:122093760-123174023	C	metabolism-related	CCDC28B	coiled-coil domain containing 28B
2	chr2:122093760-123174023	C	metabolism-related	PTP4A2	protein tyrosine phosphatase type IVA, member 2
2	chr2:122093760-123174023	C	reproduction-related	SPOCD1	SPOC domain containing 1
2	chr2:122093760-123174023	C	metabolism-related	BAI2	brain-specific angiogenesis inhibitor 2
2	chr2:83773495-84466855	D	pseudogene	LOC781256	UV excision repair protein RAD23 homolog B pseudogene
3	chr3:8785868-10462387	A	disease-related	LY9	T-lymphocyte antigen 9
3	chr3:8785868-10462387	A	disease-related	CD48	CD48 molecule; antigen precursor
3	chr3:8785868-10462387	A	disease-related	CD84	CD84 molecule
3	chr3:8785868-10462387	A	disease-related	IGSF8	immunoglobulin superfamily, member 8
3	chr3:8785868-10462387	A	disease-related	IGSF9	immunoglobulin superfamily, member 9
3	chr3:8785868-10462387	A	metabolism-related	CD244	CD244 molecule, natural killer cell receptor 2B4
3	chr3:8785868-10462387	A	metabolism-related	LOC613822	SLAM (Signaling Lymphocyte Activation Molecule) family member 9
3	chr3:8785868-10462387	A	metabolism-related	LOC100336790	nucleolin-like
3	chr3:8785868-10462387	A	metabolism-related	PIFO	chromosome 3 open reading frame, human C1orf88-like
3	chr3:8785868-10462387	A	metabolism-related	LOC100138271	oviduct-specific glycoprotein-like
3	chr3:8785868-10462387	A	metabolism-related	SLAMF7	SLAM family member 7
3	chr3:8785868-10462387	A	metabolism-related	SLAMF1	SLAM family member 1
3	chr3:8785868-10462387	A	metabolism-related	SLAMF6	SLAM family member 6
3	chr3:8785868-10462387	A	metabolism-related	LOC787875	cyclin-C pseudogene
3	chr3:8785868-10462387	A	metabolism-related	VANGL2	VANGL planar cell polarity protein 2
3	chr3:8785868-10462387	A	metabolism-related	LOC104971425	basic proline-rich protein-like
3	chr3:8785868-10462387	A	metabolism-related	NHLH1	nescient helix loop helix 1
3	chr3:8785868-10462387	A	metabolism-related	NCSTN	nicastrin
3	chr3:8785868-10462387	A	metabolism-related	COPA	coatomer protein complex, subunit alpha
3	chr3:8785868-10462387	A	metabolism-related	PEX19	peroxisomal biogenesis factor 19
3	chr3:8785868-10462387	A	metabolism-related	DCAF8	DDB1 and CUL4 associated factor 8
3	chr3:8785868-10462387	A	metabolism-related	PEA15	phosphoprotein enriched in astrocytes 15
3	chr3:8785868-10462387	A	metabolism-related	CASQ1	calsequestrin 1 (fast-twitch, skeletal muscle)
3	chr3:8785868-10462387	A	metabolism-related	ATP1A4	ATPase, Na+/K+ transporting, alpha 4 polypeptide
3	chr3:8785868-10462387	A	metabolism-related	ATP1A2	ATPase, Na+/K+ transporting, alpha 2 polypeptide
3	chr3:8785868-10462387	A	metabolism-related	KCNJ9	potassium inwardly-rectifying channel, subfamily J, member 9
3	chr3:8785868-10462387	A	metabolism-related	KCNJ10	potassium inwardly-rectifying channel, subfamily J, member 10
3	chr3:8785868-10462387	A	metabolism-related	PIGM	phosphatidylinositol glycan anchor biosynthesis, class M
3	chr3:8785868-10462387	A	metabolism-related	SLAMF9	SLAM family member 9
3	chr3:8785868-10462387	A	metabolism-related	TAGLN2	transgelin 2
3	chr3:8785868-10462387	A	metabolism-related	MIR1584	microRNA mir-1584
3	chr3:8785868-10462387	A	metabolism-related	CFAP45	cilia and flagella associated protein 45
3	chr3:8785868-10462387	A	metabolism-related	VSIG8	V-set and immunoglobulin domain containing 8
3	chr3:8785868-10462387	A	metabolism-related	SLAMF8	SLAM family member 8
3	chr3:8785868-10462387	A	metabolism-related	FCRL6	Fc receptor-like 6
3	chr3:8785868-10462387	A	metabolism-related	DUSP23	dual specificity phosphatase 23
3	chr3:8785868-10462387	A	metabolism-related	CRP	C-reactive protein, pentraxin-related
3	chr3:8785868-10462387	A	metabolism-related	LOC530245	putative olfactory receptor 10J6
3	chr3:8785868-10462387	A	metabolism-related	APCS	amyloid P component, serum
3	chr3:8785868-10462387	A	metabolism-related	LOC100848694	BRCA1-associated RING domain protein 1 pseudogene
3	chr3:8785868-10462387	A	metabolism-related	OR10J5	olfactory receptor, family 10, subfamily J, member 5
3	chr3:8785868-10462387	A	metabolism-related	LOC616952	olfactory receptor 10J1
3	chr3:8785868-10462387	A	metabolism-related	TRNAC-ACA	transfer RNA cysteine (anticodon ACA)
3	chr3:72154658-73098204	A	metabolism-related	LOC785254	actin-related protein 2/3 complex subunit 2 pseudogene
3	chr3:8785868-10462387	A	pseudogene	LOC100139781	nucleolin pseudogene
3	chr3:8785868-10462387	A	metabolism-related	OR10J3	olfactory receptor, family 10, subfamily J, member 3
3	chr3:8785868-10462387	A	metabolism-related	OR10J1	olfactory receptor, family 10, subfamily J, member 1
3	chr3:8785868-10462387	A	uncharacherized	LOC101902818	uncharacterized LOC101902818
3	chr3:8785868-10462387	A	uncharacherized	LOC101902959	uncharacterized LOC101902959
3	chr3:8785868-10462387	A	uncharacherized	LOC104971419	uncharacterized LOC104971419
3	chr3:8785868-10462387	A	uncharacherized	LOC101903058	uncharacterized LOC101903058
3	chr3:8785868-10462387	A	uncharacherized	LOC101903248	uncharacterized LOC101903248
3	chr3:8785868-10462387	A	uncharacherized	LOC104971421	uncharacterized LOC104971421
3	chr3:8785868-10462387	A	uncharacherized	LOC104971422	uncharacterized LOC104971422
3	chr3:8785868-10462387	A	uncharacherized	LOC790098	uncharacterized LOC790098
3	chr3:72154658-73098204	A	uncharacherized	LOC101907235	uncharacterized LOC101907235
3	chr3:108966655-109726637	D	growth-related	MEAF6	cell proliferation
3	chr3:108966655-109726637	D	metabolism-related	LOC104971855	basic salivary proline-rich protein 4-like
3	chr3:108966655-109726637	D	metabolism-related	GRIK3	glutamate receptor
3	chr3:108966655-109726637	D	metabolism-related	ZC3H12A	zinc finger
7	chr7:46495752-46835388	B	reproduction-related	FSTL4	follistatin-like 4
7	chr7:46495752-46835388	B	uncharacherized	LOC101902525	uncharacterized LOC101902525
7	chr7:51347216-51695898	G	growth-related	EGR1	early growth response 1
7	chr7:51347216-51695898	G	metabolism-related	REEP2	receptor accessory protein 2
7	chr7:51347216-51695898	G	uncharacherized	LOC101904825	uncharacterized LOC101904825
7	chr7:51347216-51695898	G	uncharacherized	LOC101904907	uncharacterized LOC101904907
7	chr7:51347216-51695898	G	metabolism-related	CDC25C	Dual specificity phosphatase Cdc25C
7	chr7:51347216-51695898	G	reproduction-related	SLBP2	oocyte-specific histone RNA stem-loop-binding protein 2-like
7	chr7:51347216-51695898	G	metabolism-related	MIR2459	microRNA mir-2459
7	chr7:51347216-51695898	G	metabolism-related	FAM53C	family with sequence similarity 53, member C
7	chr7:51347216-51695898	G	metabolism-related	KDM3B	lysine (K)-specific demethylase 3B
7	chr7:51347216-51695898	G	pseudogene	LOC101904955	POU domain, class 5, transcription factor 1 pseudogene
7	chr7:51347216-51695898	G	metabolism-related	ETF1	eukaryotic translation termination factor 1
7	chr7:51347216-51695898	G	metabolism-related	HSPA9	heat shock 70kDa protein 9 (mortalin)
9	chr9:40172952-40219996	D	uncharacherized	LOC101905383	uncharacterized LOC101905383
9	chr9:40231967-40267954	D	disease-related	SLC22A16	solute carrier family 22 (organic cation/carnitine transporter), member 16
9	chr9:4027618-40293612	D	metabolism-related	DDO	D-aspartate oxidase
9	chr9:40335079-40464971	D	metabolism-related	METTL24	methyltransferase like 24
9	chr9:40471772-40520275	D	metabolism-related	CDC40	cell division cycle 40
9	chr9:40520426-40591232	D	reproduction-related	WASF1	WAS protein family, member 1
9	chr9:40623225-40633672	D	uncharacherized	LOC104969538	uncharacterized LOC104969538
9	chr9:40704336-40706856	D	metabolism-related	GPR6	G protein-coupled receptor 6
9	chr9:40873045-41046028	D	metabolism-related	FIG4	FIG4 phosphoinositide 5-phosphatase
9	chr9:41046123-41163187	D	metabolism-related	AK9	adenylate kinase 9
9	chr9:41167497-41177827	D	disease-related	ZBTB24	zinc finger and BTB domain containing 24
9	chr9:41186050-41197426	D	metabolism-related	MICAL1	microtubule associated monooxygenase, calponin and LIM domain containing 1
9	chr9:41197561-41200873	D	metabolism-related	SMPD2	sphingomyelin phosphodiesterase 2, neutral membrane (neutral sphingomyelinase)
9	chr9:41200910-41237580	D	metabolism-related	PPIL6	peptidylprolyl isomerase (cyclophilin)-like 6
9	chr9:41246268-41258835	D	disease-related	CD164	CD164 molecule, sialomucin
9	chr9:41263063-41426537	D	uncharacherized	CCDC162P	coiled-coil domain containing 162, pseudogene
9	chr9:41468781-41554347	D	metabolism-related	CEP57L1	centrosomal protein 57kDa-like 1
9	chr9:41554634-41690068	D	metabolism-related	SESN1	sestrin 1
9	chr9:41703189-41802334	D	metabolism-related	ARMC2	armadillo repeat containing 2
9	chr9:41768526-41775772	D	uncharacherized	LOC104969539	uncharacterized LOC104969539
9	chr9:41806196-41833808	D	uncharacherized	LOC104972978	uncharacterized LOC104972978
9	chr9:41827551-41829432	D	uncharacherized	LOC104969540	uncharacterized LOC104969540
9	chr9:41917228-41978477	D	uncharacherized	LOC101909894	uncharacterized LOC101909894
9	chr9:41976480-41978263	D	uncharacherized	LOC104969541	uncharacterized LOC104969541
9	chr9:41989615-42120139	D	disease-related	FOXO3	forkhead box O3
9	chr9:42153688-42350698	D	disease-related	LACE1	lactation elevated 1
9	chr9:42351187-42352061	D	uncharacherized	LOC784208	ribosomal protein S4, Y-linked 2
9	chr9:42370448-42417661	D	metabolism-related	SNX3	sorting nexin 3
9	multilocus	D	metabolism-related	TRNAE-UUC	transfer RNA glutamic acid (anticodon UUC)
9	chr9:42435613-42456081	D	uncharacherized	NR2E1	nuclear receptor subfamily 2, group E, member 1
9	chr9:42491542-42493454	D	uncharacherized	LOC104969543	protein Mis18-beta pseudogene
9	chr9:42507614-42545318	D	uncharacherized	LOC104969542	uncharacterized LOC104969542
9	chr9:42539837-42539918	D	metabolism-related	TRNAL-CAA	transfer RNA leucine (anticodon CAA)
9	chr9:42546053-42546652	D	uncharacherized	LOC505856	transgelin 2 pseudogene
9	chr9:42550594-42551527	D	uncharacherized	LOC101906052	uncharacterized LOC101906052
9	chr9:42568709-42569201	D	uncharacherized	LOC524507	40S ribosomal protein S19 pseudogene
9	chr9:42551625-42594527	D	disease-related	OSTM1	osteopetrosis associated transmembrane protein 1
9	chr9:42651150-42718789	D	disease-related	SEC63	SEC63 homolog (S. cerevisiae)
9	chr9:42756884-42868592	D	growth-related	SCML4	sex comb on midleg-like 4 (Drosophila)
9	chr9:42890172-42905547	D	uncharacherized	LOC104969545	uncharacterized LOC104969545
9	chr9:42925969-42937585	D	uncharacherized	LOC104969544	uncharacterized LOC104969544
9	chr9:42904316-43070361	D	disease-related	SOBP	sine oculis binding protein homolog (Drosophila)
9	multilocus	D	metabolism-related	TRNAK-CUU	transfer RNA lysine (anticodon CUU)
9	chr9:43099804-43363804	D	disease-related	PDSS2	prenyl (decaprenyl) diphosphate synthase, subunit 2
9	chr9:43363901-43427546	D	metabolism-related	BEND3	BEN domain containing 3
9	chr9:43435672-43446267	D	uncharacherized	C9H6orf203	chromosome 9 open reading frame, human C6orf203
9	chr9:43457861-43460942	D	uncharacherized	LOC100137843	bifunctional 3'-phosphoadenosine 5'-phosphosulfate synthase 1-like
9	chr9:43492259-43495786	D	disease-related	CD24	CD24 molecule
9	chr9:43523770-43524282	D	uncharacherized	LOC614649	60S ribosomal protein L23a pseudogene
9	chr9:43504377-43731719	D	uncharacherized	LOC104969546	uncharacterized LOC104969546
9	chr9:43672871-43688292	D	uncharacherized	LOC104972979	uncharacterized LOC104972979
9	chr9:43793254-43832683	D	reproduction-related	QRSL1	glutaminyl-tRNA synthase (glutamine-hydrolyzing)-like 1
9	chr9:43831409-43884020	D	disease-related	RTN4IP1	reticulon 4 interacting protein 1
9	chr9:43885350-44132840	D	disease-related	AIM1	absent in melanoma 1
9	chr9:44166889-44204889	D	disease-related	ATG5	autophagy related 5
9	chr9:44220630-44227595	D	uncharacherized	LOC104972982	uncharacterized LOC104972982
9	chr9:44223998-442227661	D	uncharacherized	LOC104972981	uncharacterized LOC104972981
9	chr9:44228776-44230396	D	uncharacherized	LOC104969548	40S ribosomal protein S3a-like
9	chr9:44242633-44290799	D	uncharacherized	LOC100336714	autophagy protein 5
9	chr9:44307944-44311713	D	uncharacherized	LOC104969547	uncharacterized LOC104969547
9	chr9:44311016-44314111	D	uncharacherized	LOC100847546	40S ribosomal protein S3a pseudogene
9	chr9:44355220-44377512	D	disease-related	PRDM1	PR domain containing 1, with ZNF domain
9	chr9:44546350-44547195	D	uncharacherized	LOC781322	60S ribosomal protein L6 pseudogene
9	chr9:44677062-44677508	D	uncharacherized	LOC784251	40S ribosomal protein S25 pseudogene
9	chr9:45169675-45301786	D	disease-related	PREP	prolyl endopeptidase
9	chr9:45381843-45455741	D	disease-related	POPDC3	popeye domain containing 3
9	chr9:45445880-45446924	D	metabolism-related	LOC101902273	HIG1 domain family member 1A, mitochondrial pseudogene
9	chr9:45475377-45526184	D	disease-related	BVES	blood vessel epicardial substance
9	chr9:45538880-45680826	D	disease-related	LIN28B	lin-28 homolog B (C. elegans)
9	chr9:45681270-45693222	D	uncharacherized	LOC101902530	uncharacterized LOC101902530
9	chr9:45693237-45695450	D	uncharacherized	LOC104969551	uncharacterized LOC104969551
9	chr9:45697462-45699461	D	uncharacherized	LOC104969550	uncharacterized LOC104969550
9	chr9:45701026-45705640	D	uncharacherized	LOC100138772	eukaryotic translation initiation factor 4E-like
9	chr9:45737379-45855545	D	metabolism-related	HACE1	HECT domain and ankyrin repeat containing E3 ubiquitin protein ligase 1
9	chr9:45880796-45886734	D	uncharacherized	LOC104969552	uncharacterized LOC104969552
9	chr9:45960854-45961267	D	uncharacherized	LOC104969553	60S ribosomal protein L28 pseudogene
9	chr9:46185753-46187469	D	uncharacherized	LOC785087	elongation factor 1-alpha 1 pseudogene
9	multilocus	D	metabolism-related	TRNAC-ACA	transfer RNA cysteine (anticodon ACA)
9	chr9:46711664-46750299	D	uncharacherized	LOC101902933	uncharacterized LOC101902933
9	multilocus	D	metabolism-related	TRNAM-CAU	transfer RNA methionine (anticodon CAU)
9	chr9:47090651-47161763	D	uncharacherized	LOC104972983	uncharacterized LOC104972983
9	chr9:47224252-47224631	D	uncharacherized	LOC783945	T-cell receptor beta chain V region CTL-F3
9	chr9:47823419-47900286	D	uncharacherized	LOC528043	UDP-GalNAc:beta-1,3-N-acetylgalactosaminyltransferase 2 pseudogene
9	chr9:48164703-48177607	D	uncharacherized	LOC101903288	uncharacterized LOC101903288
9	multilocus	D	metabolism-related	GRIK2	glutamate receptor, ionotropic, kainate 2
9	chr9:49020497-49027804	D	uncharacherized	LOC104969555	uncharacterized LOC104969555
9	multilocus	D	disease-related	ASCC3	activating signal cointegrator 1 complex subunit 3
9	chr9:49838098-49839034	D	reproduction-related	LOC518885	protein olfactory receptor 8G2
9	chr9:49987741-49988503	D	uncharacherized	LOC104972985	testis-specific Y-encoded protein 1-like
9	chr9:49993006-49993578	D	uncharacherized	LOC104972984	uncharacterized LOC104972984
9	multilocus	D	metabolism-related	TRNAC-GCA	transfer RNA cysteine (anticodon GCA)
9	chr9:50160697-50228919	D	metabolism-related	SIM1	single-minded family bHLH transcription factor 1
9	chr9:50574514-50577394	D	uncharacherized	LOC781964	AP-2 complex subunit beta pseudogene
9	chr9:50577745-50579682	D	uncharacherized	LOC101904646	uncharacterized LOC101904646
9	chr9:50584664-50623292	D	metabolism-related	MCHR2	melanin-concentrating hormone receptor 2
9	chr9:50840338-50841839	D	uncharacherized	LOC104969557	uncharacterized LOC104969557
9	chr9:50873669-50881408	D	disease-related	PRDM13	PR domain containing 13
9	chr9:50920260-50946139	D	metabolism-related	CCNC	cyclin C
9	chr9:50928334-50954421	D	metabolism-related	TSTD3	thiosulfate sulfurtransferase (rhodanese)-like domain containing 3
9	chr9:50958938-51013480	D	metabolism-related	USP45	ubiquitin specific peptidase 45
9	chr9:51046370-51051521	D	metabolism-related	PNISR	PNN-interacting serine/arginine-rich protein
9	chr9:51053666-51077752	D	metabolism-related	COQ3	coenzyme Q3 methyltransferase
9	chr9:51081387-51082127	D	uncharacherized	LOC104969559	uncharacterized LOC104969559
9	chr9:51094066-51165426	D	uncharacherized	FAXC	failed axon connections homolog
9	chr9:51202907-51280433	D	uncharacherized	LOC101904783	uncharacterized LOC101904783
9	chr9:51485365-51561211	D	disease-related	FBXL4	F-box and leucine-rich repeat protein 4
9	chr9:51554313-51558355	D	uncharacherized	LOC101904829	F-box/LRR-repeat protein 4-like
9	chr9:51596388-51597141	D	disease-related	POU3F2	POU class 3 homeobox 2
9	chr9:51598794-51601374	D	uncharacherized	LOC104969560	uncharacterized LOC104969560
9	chr9:51888887-51949781	D	uncharacherized	LOC104969561	uncharacterized LOC104969561
9	chr9:52048219-52048800	D	uncharacherized	LOC781989	60S ribosomal protein L17 pseudogene
9	chr9:52077282-52088771	D	uncharacherized	LOC101905062	uncharacterized LOC101905062
9	chr9:52259297-52322905	D	uncharacherized	LOC104969562	uncharacterized LOC104969562
9	multilocus	D	metabolism-related	TRNAS-GGA	transfer RNA serine (anticodon GGA)
9	multilocus	D	metabolism-related	TRNAY-GUA	transfer RNA tyrosine (anticodon GUA)
9	chr9:52644764-52792169	D	uncharacherized	LOC101905474	uncharacterized LOC101905474
9	chr9:52921132-52922729	D	uncharacherized	LOC788043	inositol polyphosphate-5-phosphatase F pseudogene
9	chr9:53136866-53199224	D	uncharacherized	LOC104969563	uncharacterized LOC104969563
9	chr9:53224516-53227893	D	uncharacherized	LOC100848581	uncharacterized LOC100848581
9	chr9:53227933-53352784	D	disease-related	MMS22L	MMS22-like, DNA repair protein
9	chr9:53356429-53539428	D	growth-related	KLHL32	kelch-like family member 32
9	chr9:53637027-53640274	D	uncharacherized	LOC104969564	uncharacterized LOC104969564
9	chr9:53641637-53642593	D	uncharacherized	LOC104969565	uncharacterized LOC104969565
9	chr9:53644596-53645257	D	uncharacherized	LOC104969566	uncharacterized LOC104969566
9	chr9:53673441-53682100	D	disease-related	NDUFAF4	NADH dehydrogenase (ubiquinone) complex I, assembly factor 4
9	chr9:53749032-53817833	D	metabolism-related	GPR63	G protein-coupled receptor 63
9	chr9:53877613-53911600	D	uncharacherized	LOC104969569	uncharacterized LOC104969569
9	chr9:53922868-53989249	D	uncharacherized	LOC104969568	uncharacterized LOC104969568
9	chr9:53940367-54030371	D	reproduction-related	FHL5	four and a half LIM domains 5
9	chr9:54036715-54104476	D	metabolism-related	UFL1	UFM1-specific ligase 1
9	multilocus	D	metabolism-related	TRNAG-UCC	transfer RNA glycine (anticodon UCC)
9	chr9:54432717-54433817	D	reproduction-related	FUT9	fucosyltransferase 9 (alpha (1,3) fucosyltransferase)
9	chr9:54749271-54750779	D	uncharacherized	LOC782007	zinc finger, CCHC domain containing 13 pseudogene
9	chr9:54913401-54941729	D	uncharacherized	LOC104969571	uncharacterized LOC104969571
9	chr9:55015378-55015671	D	uncharacherized	LOC783932	small ubiquitin-related modifier 1 pseudogene
9	chr9:55111017-55194776	D	metabolism-related	MANEA	mannosidase, endo-alpha
9	chr9:55407763-55430988	D	uncharacherized	LOC101907134	uncharacterized LOC101907134
9	chr9:55622783-55635513	D	uncharacherized	LOC104969573	uncharacterized LOC104969573
9	chr9:55635521-55638468	D	uncharacherized	LOC104969572	uncharacterized LOC104969572
9	chr9:56339730-56340429	D	uncharacherized	LOC782448	rab-like protein 2A pseudogene
9	chr9:57327837-57330964	D	uncharacherized	LOC104969581	uncharacterized LOC104969581
9	chr9:57504330-57517853	D	uncharacherized	LOC782527	tripartite motif-containing protein 5-like
9	chr9:57622886-57833029	D	disease-related	EPHA7	EPH receptor A7
9	chr9:59484962-59507531	D	uncharacherized	LOC101902191	uncharacterized LOC101902191
9	chr9:59386561-59609483	D	uncharacherized	LOC101902249	uncharacterized LOC101902249
9	chr9:59628600-59696257	D	uncharacherized	LOC104969577	uncharacterized LOC104969577
9	chr9:60034344-60038309	D	uncharacherized	LOC104969578	uncharacterized LOC104969578
9	chr9:60135442-60197734	D	uncharacherized	LOC104969580	uncharacterized LOC104969580
9	chr9:60278004-60280471	D	uncharacherized	LOC782675	U3 small nucleolar RNA-associated protein 14 homolog A pseudogene
9	chr9:60462279-60555417	D	uncharacherized	LOC101902479	uncharacterized LOC101902479
9	chr9:60555544-60620954	D	metabolism-related	MAP3K7	mitogen-activated protein kinase kinase kinase 7
9	chr9:60644581-60645881	D	uncharacherized	LOC104969579	uncharacterized LOC104969579
9	chr9:60827904-61225801	D	disease-related	BACH2	BTB and CNC homology 1, basic leucine zipper transcription factor 2
9	chr9:61231265-61243234	D	growth-related	GJA10	gap junction protein, alpha 10, 62kDa
9	chr9:61249443-61284678	D	disease-related	CASP8AP2	caspase 8 associated protein 2
9	chr9:61291277-61431434	D	metabolism-related	MDN1	MDN1, midasin homolog (yeast)
9	chr9:61434665-61436744	D	metabolism-related	LYRM2	LYR motif containing 2
9	chr9:61455917-61455979	D	uncharacherized	MIR7862	microRNA mir-7862
9	chr9:61519188-61521582	D	uncharacherized	LOC100140683	calponin-3-like
9	chr9:61441067-61624884	D	metabolism-related	ANKRD6	ankyrin repeat domain 6
9	chr9:61625036-61626753	D	uncharacherized	LOC101903075	uncharacterized LOC101903075
9	multilocus	D	growth-related	GABRR2	gamma-aminobutyric acid (GABA) A receptor, rho 2
9	multilocus	D	metabolism-related	RRAGD	Ras-related GTP binding D
14	chr14:23384687-23846732	B	metabolism-related	ATP6V1H	ATPase, H+ transporting, lysosomal 50/57kDa, V1 subunit H
14	chr14:23384687-23846732	B	metabolism-related	MRPL15	mitochondrial ribosomal protein L15
14	chr14:23384687-23846732	B	metabolism-related	OPRK1	opioid receptor, kappa 1
14	chr14:23384687-23846732	B	metabolism-related	RGS20	regulator of G-protein signaling 20
14	chr14:23384687-23846732	B	metabolism-related	LYPLA1	lysophospholipase I
14	chr14:23384687-23846732	B	metabolism-related	TRNAG-UCC	transfer RNA glycine (anticodon UCC)
14	chr14:23384687-23846732	B	metabolism-related	TRNAC-GCA	transfer RNA cysteine (anticodon GCA)
14	chr14:23384687-23846732	B	metabolism-related	TCEA1	transcription elongation factor A (SII), 1
14	chr14:23384687-23846732	B	uncharacherized	LOC101906669	uncharacterized LOC101906669
14	chr14: 24532336-25284162	E	disease-related	TGS1	trimethylguanosine synthase 1 in humans involved in brain tumors
14	chr14: 24532336-25284162	E	growth-related	CHCHD7	associated with growth in humans
14	chr14: 24532336-25284162	E	growth-related	PLAG1	daily body weight gain and scheletal growth
14	chr14: 24532336-25284162	E	growth-related	PENK	codes for the opioid growth factor
14	chr14: 24532336-25284162	E	disease-related	LYN	proto-oncogene, it's related to autoimmunity
14	chr14: 24532336-25284162	E	metabolism-related	TRNAT-AGU	transfer RNA threonine (anticon AGU), present on several chromosomes
14	chr14: 24532336-25284162	E	metabolism-related	XKR4 XK	Kell blood group complex. Associated with subcutaneous fat thickness and serum prolactin concentrations
14	chr14: 24532336-25284162	E	metabolism-related	RPS20	ribosomal protein S20
14	chr14: 24532336-25284162	E	growth-related	ADR16C6	effect on fat colour
14	chr14: 24532336-25284162	E	metabolism-related	TMEM68	transmembrane protein
14	chr14: 24532336-25284162	E	reproduction-related	MOS	moloney murine sarcoma viral oncogene homolog
16	chr16:43623611-43804119	A	metabolism-related	CASZ1	castor zinc finger 1
16	chr16:44940445-45536923	E	metabolism-related	SPSB1	splA/ryanodine receptor domain and SOCS (Suppressors Of Cytokine Signaling) box containing 1
16	chr16:44940445-45536923	E	metabolism-related	H6PD	hexose-6-phosphate dehydrogenase (glucose 1-dehydrogenase)
16	chr16:44940445-45536923	E	metabolism-related	MIR34A	microRNA mir-34a
16	chr16:44940445-45536923	E	metabolism-related	SLC2A5	solute carrier family 2 (facilitated glucose/fructose transporter), member 5
16	chr16:44940445-45536923	E	metabolism-related	CA6	carbonic anhydrase VI
16	chr16:44940445-45536923	E	metabolism-related	ENO1	enolase 1, (alpha)
16	chr16:44940445-45536923	E	metabolism-related	LOC104974447	atherin-like
16	chr16:44940445-45536923	E	metabolism-related	RERE	arginine-glutamic acid dipeptide (RE) repeats
16	chr16:44940445-45536923	E	metabolism-related	GPR157	G protein-coupled receptor 157
16	chr16:44940445-45536923	E	uncharacherized	LOC104974443	uncharacterized LOC104974443
16	chr16:44940445-45536923	E	uncharacherized	LOC104974444	uncharacterized LOC104974444
16	chr16:44940445-45536923	E	uncharacherized	LOC101905940	uncharacterized LOC101905940
20	chr20:30306262-40001507	F	disease-related	PRLR	prolactin receptor
20	chr20:30306262-40001507	F	growth-related	GHR	growth hormone receptor
20	chr20:30306262-40001507	F	disease-related	CCL28	chemokine (C-C motif) ligand 28
20	chr20:30306262-40001507	F	metabolism-related	NNT	nicotinamide nucleotide transhydrogenase
20	chr20:30306262-40001507	F	metabolism-related	HMGCS1	3-hydroxy-3-methylglutaryl-CoA synthase 1 (soluble)
20	chr20:30306262-40001507	F	metabolism-related	RPL37	ribosomal protein L37
20	chr20:30306262-40001507	F	metabolism-related	BRIX1	BRX1, biogenesis of ribosomes, homolog (S. cerevisiae)
20	chr20:30306262-40001507	F	metabolism-related	PRKAA1	protein kinase, AMP-activated, alpha 1 catalytic subunit
20	chr20:30306262-40001507	F	metabolism-related	C20H5orf28	chromosome 20 open reading frame, human C5orf28
20	chr20:30306262-40001507	F	metabolism-related	PTGER4	prostaglandin E receptor 4 (subtype EP4)
20	chr20:30306262-40001507	F	metabolism-related	FYB	FYN binding protein
20	chr20:30306262-40001507	F	metabolism-related	OSMR	oncostatin M receptor
20	chr20:30306262-40001507	F	metabolism-related	LIFR	leukemia inhibitory factor receptor alpha
20	chr20:30306262-40001507	F	metabolism-related	IL7R	interleukin 7 receptor
20	chr20:30306262-40001507	F	metabolism-related	SLC45A2	solute carrier family 45, member 2
20	chr20:30306262-40001507	F	reproduction-related	SPEF2	sperm flagellar 2
20	chr20:30306262-40001507	F	metabolism-related	SEPP1	selenoprotein P, plasma, 1
20	chr20:30306262-40001507	F	metabolism-related	CCDC152	coiled-coil domain containing 152
20	chr20:30306262-40001507	F	metabolism-related	FBXO4	F-box protein 4
20	chr20:30306262-40001507	F	metabolism-related	OXCT1	3-oxoacid CoA transferase 1
20	chr20:30306262-40001507	F	metabolism-related	PLCXD3	phosphatidylinositol-specific phospholipase C, X domain containing 3
20	chr20:30306262-40001507	F	metabolism-related	DAB2	Dab, mitogen-responsive phosphoprotein, homolog 2 (Drosophila)
20	chr20:30306262-40001507	F	metabolism-related	EGFLAM	EGF-like, fibronectin type III and laminin G domains
20	chr20:30306262-40001507	F	metabolism-related	GDNF	glial cell derived neurotrophic factor
20	chr20:30306262-40001507	F	metabolism-related	WDR70	WD repeat domain 70
20	chr20:30306262-40001507	F	metabolism-related	C20H5orf42	chromosome 20 open reading frame, human C5orf42
20	chr20:30306262-40001507	F	uncharacherized	NIPBL	Nipped-B homolog (Drosophila)
20	chr20:30306262-40001507	F	metabolism-related	SLC1A3	solute carrier family 1 (glial high affinity glutamate transporter), member 3
20	chr20:30306262-40001507	F	metabolism-related	RANBP3L	RAN binding protein 3-like
20	chr20:30306262-40001507	F	metabolism-related	TTC23L	tetratricopeptide repeat domain 23-like
